# Supplementary material for: Observed shifts in the contact zone between two forms of the diving beetle Hydroporus memnonius are consistent with predictions from sexual conflict
Source: PeerJ. 2016 Jun 14;4:e2089. doi: 10.7717/peerj.2089 (PMC4911956; doi:10.7717/peerj.2089)
Supplement: Supplemental Information 1 [file peerj-04-2089-s001.xlsx]

## Sheet: Raw Data
SPECIES code	GENUS	SPECIES	Acclimation Temperature	site	wet weight (mg)	sex (m/f)	Experiment	CTmax	CTmin
H.MEM MM_1	Hydroporus	memnonius	20	MM	5.9	m	CTmin		-4.7
H.MEM MM_2	Hydroporus	memnonius	20	MM	6.1	m	CTmin		-6.8
H.MEM MM_3	Hydroporus	memnonius	20	MM	5.9	m	CTmin		-6.8
H.MEM MM_4	Hydroporus	memnonius	20	MM	4.9	f	CTmin		-10.3
H.MEM MM_5	Hydroporus	memnonius	20	MM	5.7	m	CTmin		-6.8		MM = Moorthwaite Moss, Cumberland (var. castaneus)
H.MEM MM_6	Hydroporus	memnonius	20	MM	4.6	f	CTmin		-4.7		LD = Loch Doon, Ayrshire (shining form)
H.MEM MM_7	Hydroporus	memnonius	20	MM	4.8	m	CTmin		-8
H.MEM MM_8	Hydroporus	memnonius	20	MM	5.2	f	CTmin		-10.3
H.MEM MM_9	Hydroporus	memnonius	20	MM	4.9	f	CTmin		-10.3
H.MEM MM_10	Hydroporus	memnonius	20	MM	5.8	m	CTmin		-8
H.MEM MM_11	Hydroporus	memnonius	20	MM	5.1	m	CTmin		-9.5
H.MEM MM_12	Hydroporus	memnonius	20	MM	5.3	m	CTmin		-6.5
H.MEM MM_13	Hydroporus	memnonius	20	MM	5.7	f	CTmin		-8
H.MEM MM_14	Hydroporus	memnonius	20	MM	5.5	m	CTmin		-9.5
H.MEM MM_15	Hydroporus	memnonius	20	MM	5.4	m	CTmin		-8
H.MEM MM_16	Hydroporus	memnonius	10	MM	5.6	f	CTmax	40.5
H.MEM MM_17	Hydroporus	memnonius	10	MM	5.7	f	CTmax	40
H.MEM MM_18	Hydroporus	memnonius	10	MM	5.3	m	CTmax	40
H.MEM MM_19	Hydroporus	memnonius	10	MM	4.7	m	CTmax	40
H.MEM MM_20	Hydroporus	memnonius	10	MM	7.1	m	CTmax	41
H.MEM MM_21	Hydroporus	memnonius	10	MM	6	f	CTmax	42.7
H.MEM MM_22	Hydroporus	memnonius	10	MM	5.8	f	CTmax	42.7
H.MEM MM_23	Hydroporus	memnonius	10	MM	5	m	CTmax	40.2
H.MEM MM_24	Hydroporus	memnonius	10	MM	5	f	CTmax	40.2
H.MEM MM_25	Hydroporus	memnonius	10	MM	5.1	m	CTmax	41
H.MEM MM_26	Hydroporus	memnonius	10	MM	4.9	f	CTmax	41
H.MEM MM_27	Hydroporus	memnonius	10	MM	5.2	m	CTmax	41
H.MEM MM_28	Hydroporus	memnonius	10	MM	5.3	f	CTmax	41.5
H.MEM MM_29	Hydroporus	memnonius	10	MM	5.3	f	CTmax	42
H.MEM MM_30	Hydroporus	memnonius	10	MM	6.8	m	CTmax	41.5
H.MEM MM_31	Hydroporus	memnonius	10	MM	5.6	m	CTmin		-6.7
H.MEM MM_32	Hydroporus	memnonius	10	MM	4.4	m	CTmin		-12
H.MEM MM_33	Hydroporus	memnonius	10	MM	5.5	f	CTmin		-8.2
H.MEM MM_34	Hydroporus	memnonius	10	MM	5.8	m	CTmin		-10.2
H.MEM MM_35	Hydroporus	memnonius	10	MM	5.6	f	CTmin		-13
H.MEM MM_36	Hydroporus	memnonius	10	MM	6.2	m	CTmin		-6.7
H.MEM MM_37	Hydroporus	memnonius	10	MM	5.4	f	CTmin		-9.4
H.MEM MM_38	Hydroporus	memnonius	10	MM	5.8	f	CTmin		-9.1
H.MEM MM_39	Hydroporus	memnonius	10	MM	5.4	f	CTmin		-9.7
H.MEM MM_40	Hydroporus	memnonius	10	MM	5.6	m	CTmin		-10.7
H.MEM MM_41	Hydroporus	memnonius	10	MM	4.7	f	CTmin		-9.1
H.MEM MM_42	Hydroporus	memnonius	10	MM	6	m	CTmin		-9.5
H.MEM MM_43	Hydroporus	memnonius	10	MM	5.6	m	CTmin		-9.5
H.MEM MM_44	Hydroporus	memnonius	10	MM	5	m	CTmin		-9.5
H.MEM MM_45	Hydroporus	memnonius	10	MM	5.1	f	CTmin		-9.1
H.MEM MM_46	Hydroporus	memnonius	20	MM	6.4	m	CTmax	41.2
H.MEM MM_47	Hydroporus	memnonius	20	MM	4.7	m	CTmax	41.2
H.MEM MM_48	Hydroporus	memnonius	20	MM	5.5	m	CTmax	41.2
H.MEM MM_49	Hydroporus	memnonius	20	MM	5	f	CTmax	42.2
H.MEM MM_50	Hydroporus	memnonius	20	MM	5.1	m	CTmax	41.2
H.MEM MM_51	Hydroporus	memnonius	20	MM	5.7	f	CTmax	41.2
H.MEM MM_52	Hydroporus	memnonius	20	MM	5.5	m	CTmax	41.2
H.MEM MM_53	Hydroporus	memnonius	20	MM	5.7	m	CTmax	41.2
H.MEM MM_54	Hydroporus	memnonius	20	MM	5.6	m	CTmax	41.2
H.MEM MM_55	Hydroporus	memnonius	20	MM	6.3	m	CTmax	42.7
H.MEM MM_56	Hydroporus	memnonius	20	MM	4.9	f	CTmax	41.2
H.MEM MM_57	Hydroporus	memnonius	20	MM	5.9	m	CTmax	41.2
H.MEM MM_58	Hydroporus	memnonius	20	MM	5	f	CTmax	42.9
H.MEM MM_59	Hydroporus	memnonius	20	MM	4.4	m	CTmax	42.5
H.MEM MM_60	Hydroporus	memnonius	20	MM	4.6	f	CTmax	41.2
H.MEM LD_1	Hydroporus	memnonius	20	LD	5.3	m	CTmin		-6.6
H.MEM LD_2	Hydroporus	memnonius	20	LD	5.2	f	CTmin		-6.5
H.MEM LD_3	Hydroporus	memnonius	20	LD	4.1	f	CTmin		-9
H.MEM LD_4	Hydroporus	memnonius	20	LD	5.2	f	CTmin		-9
H.MEM LD_5	Hydroporus	memnonius	20	LD	5	m	CTmin		-5.6
H.MEM LD_6	Hydroporus	memnonius	20	LD	5.3	m	CTmin		-9.4
H.MEM LD_7	Hydroporus	memnonius	20	LD	4.8	m	CTmin		-7.2
H.MEM LD_8	Hydroporus	memnonius	20	LD	5.3	m	CTmin		-9.4
H.MEM LD_9	Hydroporus	memnonius	20	LD	5.7	m	CTmin		-9.4
H.MEM LD_10	Hydroporus	memnonius	20	LD	4.4	m	CTmin		-7.1
H.MEM LD_11	Hydroporus	memnonius	20	LD	5.5	m	CTmin		-6.5
H.MEM LD_12	Hydroporus	memnonius	20	LD	4.9	f	CTmin		-7.2
H.MEM LD_13	Hydroporus	memnonius	20	LD	4.8	f	CTmin		-10.4
H.MEM LD_14	Hydroporus	memnonius	20	LD	4.7	m	CTmin		-7.1
H.MEM LD_15	Hydroporus	memnonius	20	LD	4.5	m	CTmin		-9.4
H.MEM LD_16	Hydroporus	memnonius	10	LD	5.8	m	CTmax	40.4
H.MEM LD_17	Hydroporus	memnonius	10	LD	4.3	m	CTmax	40.1
H.MEM LD_18	Hydroporus	memnonius	10	LD	4.6	m	CTmax	41.2
H.MEM LD_19	Hydroporus	memnonius	10	LD	5.4	m	CTmax	41.2
H.MEM LD_20	Hydroporus	memnonius	10	LD	4.4	m	CTmax	41.2
H.MEM LD_21	Hydroporus	memnonius	10	LD	5.3	m	CTmax	41
H.MEM LD_22	Hydroporus	memnonius	10	LD	5.5	m	CTmax	41.3
H.MEM LD_23	Hydroporus	memnonius	10	LD	4.6	f	CTmax	41.3
H.MEM LD_24	Hydroporus	memnonius	10	LD	5.4	f	CTmax	41.3
H.MEM LD_25	Hydroporus	memnonius	10	LD	5.6	f	CTmax	42.6
H.MEM LD_26	Hydroporus	memnonius	10	LD	6.2	m	CTmax	42.2
H.MEM LD_27	Hydroporus	memnonius	10	LD	4.2	f	CTmax	41.1
H.MEM LD_28	Hydroporus	memnonius	10	LD	4.8	m	CTmax	41.1
H.MEM LD_29	Hydroporus	memnonius	10	LD	4.2	f	CTmax	41.6
H.MEM LD_30	Hydroporus	memnonius	10	LD	5.2	m	CTmax	42.5
H.MEM LD_31	Hydroporus	memnonius	10	LD	4.3	f	CTmin		-6.8
H.MEM LD_32	Hydroporus	memnonius	10	LD	5.5	m	CTmin		-5.1
H.MEM LD_33	Hydroporus	memnonius	10	LD	5.1	m	CTmin		-6.8
H.MEM LD_34	Hydroporus	memnonius	10	LD	5.4	m	CTmin		-5.1
H.MEM LD_35	Hydroporus	memnonius	10	LD	5.5	f	CTmin		-9.5
H.MEM LD_36	Hydroporus	memnonius	10	LD	6.3	f	CTmin		-6.1
H.MEM LD_37	Hydroporus	memnonius	10	LD	4.4	f	CTmin		-6.1
H.MEM LD_38	Hydroporus	memnonius	10	LD	4.9	m	CTmin		-8
H.MEM LD_39	Hydroporus	memnonius	10	LD	5	m	CTmin		-10.6
H.MEM LD_40	Hydroporus	memnonius	10	LD	7	f	CTmin		-9.5
H.MEM LD_41	Hydroporus	memnonius	10	LD	6.2	f	CTmin		-7.4
H.MEM LD_42	Hydroporus	memnonius	10	LD	6	f	CTmin		-6.8
H.MEM LD_43	Hydroporus	memnonius	10	LD	4.6	m	CTmin		-6.8
H.MEM LD_44	Hydroporus	memnonius	10	LD	5.9	f	CTmin		-9.5
H.MEM LD_45	Hydroporus	memnonius	10	LD	5.7	m	CTmin		-8
H.MEM LD_46	Hydroporus	memnonius	20	LD	4.1	f	CTmax	41.2
H.MEM LD_47	Hydroporus	memnonius	20	LD	4.6	m	CTmax	41.3
H.MEM LD_48	Hydroporus	memnonius	20	LD	5.6	m	CTmax	41.3
H.MEM LD_49	Hydroporus	memnonius	20	LD	4.4	f	CTmax	43
H.MEM LD_50	Hydroporus	memnonius	20	LD	4	m	CTmax	40.8
H.MEM LD_51	Hydroporus	memnonius	20	LD	4.9	f	CTmax	41.4
H.MEM LD_52	Hydroporus	memnonius	20	LD	4.6	m	CTmax	41.4
H.MEM LD_53	Hydroporus	memnonius	20	LD	4.1	f	CTmax	42.5
H.MEM LD_54	Hydroporus	memnonius	20	LD	5.9	f	CTmax	44
H.MEM LD_55	Hydroporus	memnonius	20	LD	4.9	m	CTmax	41.1
H.MEM LD_56	Hydroporus	memnonius	20	LD	6.2	m	CTmax	42.7
H.MEM LD_57	Hydroporus	memnonius	20	LD	5.5	f	CTmax	43.2
H.MEM LD_58	Hydroporus	memnonius	20	LD	4.8	f	CTmax	41.8
H.MEM LD_59	Hydroporus	memnonius	20	LD	5.4	f	CTmax	41.8
H.MEM LD_60	Hydroporus	memnonius	20	LD	5.7	m	CTmax	41.8

## Sheet: Locality Details
Pop code	Locality details	Grid Ref	Form	Collector(s)
MM	13/viii/2008 England Cu Moorthwaite Moss	NY51-50-	M	DTB
LD	14/viii/2008 Scotland Ayrshire Loch Doon	NX47-99-	S	DTB & GNF
